# Supplementary material
Source: PubMed Central journal article supplement (PMC5176021)
Supplement: NIHMS794794-supplement-Supplement.pdf [file NIHMS794794-supplement-Supplement.pdf]

# Supplementary Appendix

This appendix has been provided by the authors to give readers additional information about their work.

Supplement to: Yu CC, et al. Abatacept is a treatment for B7-1-positive proteinuric kidney disease

## **Supplementary Clinical information**

Abatacept treatment for the four patients with recurrent FSGS (Patients 1-4) was approved by the University of Miami Institutional Review Board. The patient with primary FSGS (Patient 5) was treated with abatacept<sup>1</sup> in compliance with Partners Healthcare and Massachusetts General Hospital Institutional Review Board policies.

### Patients 1-4

Induction immunosuppression for Patients 1 and 2 was with anti-CD25 (daclizumab 1 mg/kg x 2 doses), thymoglobulin (1mg/kg x 5 doses) and a single dose of rituximab (375 mg/m<sup>2</sup>)<sup>2</sup>. Maintenance immunosuppression was with tacrolimus (levels 5-7 ng/ml), mycophenolate mofetil (MMF) 500 mg BID and corticosteroids. Induction immunosuppression for Patients 3 and 4 was with thymoglobulin (1mg/kg x 5 doses) and basiliximab (10 mg/kg x two doses), and a single dose of rituximab (375 mg/m<sup>2</sup>). Maintenance immunosuppression was with tacrolimus (levels 5-7 ng/ml), MMF 125 to 250 mg BID and corticosteroids. A transplant ureteral stent was placed that exited through the bladder and anterior abdominal wall in order to monitor UPC of the transplanted kidney as needed, to specifically differentiate the degree of proteinuria from the native/previous kidney transplants.

### Patient 5

The patient has preserved renal function. Her medications include Enalapril 10 mg twice a day, Simvastatin 40 mg daily, and Furosemide daily, titrated to severity of edema. She has no known allergies.

## Supplementary Experimental Data

### Quantitative analysis of B7-1 and CTLA4-Ig effects on podocyte migration (Figure 3)

This section provides detailed quantitative information about the results displayed in Figure 3 of the manuscript. Stable overexpression of B7-1 but not B7-1 $\Delta$ tail or empty vector control (pcDNA) increases directed podocyte migration, which is blocked by CTLA4-Ig. Similar to CTLA4-Ig, B7-1 $\Delta$ tail expression prevents LPS induced podocyte migration (Fig. 3C). The quantitative analysis showed the following results (see Fig. 3F, left): (n = 4 - 12; migrating cells: 53.4  $\pm$  7.23 for pcDNA (control); 142.20  $\pm$  12.03 for pcDNA + LPS; 146.25  $\pm$  12.71 for B7-1; 154.50  $\pm$  26.02 for B7-1 + LPS; 69.00  $\pm$  7.62 for B7-1 + CTLA4-Ig; 75.25  $\pm$  10.90 for B7-1 + LPS + CTLA4-Ig; 40.25  $\pm$  11.97 for B7-1 $\Delta$ tail; 50.38  $\pm$  12.66 for B7-1 $\Delta$ tail + LPS; Bonferroni's Multiple Comparison Test,  $P < 0.0001$ ). Gene silencing of B7-1 or blockade with CTLA4-Ig blocks LPS induced motility (Fig. 3D). The quantitative analysis showed the following results (see Fig. 3F, middle): n = 4- 12; migrating cells: 53.33  $\pm$  7.21 for wild type (con); 143.17  $\pm$  27.61 for wild type + LPS; 54.20  $\pm$  8.26 for scrambled; 139.60  $\pm$  16.55 for scrambled + LPS; 56.00  $\pm$  11.36 for B7-1KD; 50.38  $\pm$  11.39 for B7-1KD + LPS; 56.50  $\pm$  14.89 for wild type + CTLA4-Ig; 46.75  $\pm$  5.91 for wild type + LPS + CTLA4-Ig; n = 4-8, (Bonferroni's Multiple Comparison Test,  $P < 0.0001$ ). Gene silencing of B7-1 or CTLA4-Ig revert hypermotility of  $\alpha 3^{-/-}$  podocytes to wild type levels (Fig. 3E). The quantitative analysis showed the following results (see Fig. 3F, right): n = 4-8, migrating cells: 156.00  $\pm$  27.02 for  $\alpha 3^{-/-}$ ; 188.00  $\pm$  22.84 for  $\alpha 3^{-/-}$ /scrambled; 73.63  $\pm$  12.68 for  $\alpha 3^{-/-}$ /B7-1KD; 61.50  $\pm$  10.72 for  $\alpha 3^{-/-}$  + CTLA4-Ig; (Bonferroni's Multiple Comparison Test,  $P < 0.0001$ ).

## **Methods**

### **Immunofluorescence microscopy for B7-1 in native human renal biopsies**

Archival frozen renal biopsy cores were obtained by the diagnostic renal pathology service at Brigham and Women's Hospital as approved by BWH Institutional Review Board Protocol Number 2011P00269, and were analyzed by immunofluorescence microscopy. Diagnosis, patient gender, age and proteinuria are detailed in Tables 1, 2. Frozen tissues were cut in 4  $\mu$ m sections and air-dried 10 minutes at room temperature. Sections were washed in PBS 10 minutes and then fixed in 95% ethanol for 10 minutes. Sections were washed in PBS twice for 5 minutes each and incubated with a goat anti-human B7-1/CD80 antibody (R&D Systems) at 1:200 dilution for 45 minutes at room temperature, washed with PBS for 10 minutes, followed by incubation with donkey anti-goat Alexa Fluor488 secondary antibody (Invitrogen) at 1:200 dilution for 35 minutes at room temperature. The sections were washed with PBS and mounted with fluorescent mounting medium. Images were taken at fixed manual exposure (200 ms) with an Olympus BX53 fluorescence microscope, and processed using Adobe Photoshop software. Immunofluorescence staining intensity was scored by a blinded renal pathologist (A.W.) from 0-4+.

### **Podocyte B7-1 expression in allograft biopsies of Patients 1 and 3**

Pre- and post-reperfusion allograft biopsies were examined for B7-1 expression by immunofluorescence microscopy. The pre-perfusion biopsies were taken within 30 min of clamping the renal artery and vein of the donor kidney. The post-reperfusion biopsies were taken approximately 2 hours later. Frozen sections were incubated with a goat anti-human B7-1/CD80 antibody (R&D Systems), as above, and mouse monoclonal anti-synaptopodin<sup>3</sup>, followed by exposure to Alexa-488 secondary donkey anti-goat and Alexa-647 anti-mouse antibodies (Invitrogen). Image acquisition was performed on a Leica SP5 inverted confocal microscope.

### **Cell culture and transfection and fluorescence microscopy**

HEK293 cells<sup>4</sup>, wild type podocytes<sup>5</sup>,  $\alpha 3^{-/-}$  podocytes<sup>6,7</sup> and K562 cells<sup>8</sup> were cultured as described before. GFP-fusion proteins were analyzed by direct fluorescence microscopy in living cells or after fixation and processing for immunocytochemistry<sup>4,6,7</sup>. B7-1 full-length and truncated cDNAs (B7-1 $\Delta$ EC, B7-1 $\Delta$ tail and B7-1-tail) were cloned into pEGFP-N1 (BD Biosciences Clontech) and verified by DNA sequencing. Transient transfection of HEK293 cells and podocytes was done as described before<sup>4</sup>. For the generation of stable podocyte cell lines, wild type podocytes were transfected with 2  $\mu$ g of pcDNA3.1/Zeo-B7-1-FL or pcDNA3.1/Zeo-B7-1 $\Delta$ T plasmids using FuGENE6 following the manufacturer's instructions. A pcDNA3.1/Zeo empty plasmid served as control. Two days after transfection, 400  $\mu$ g/ml zeocin was added to the culture media for selection. Single clones were picked, and B7-1 protein abundance was assessed by Western blotting using anti-B7-1 (Epitomics) at 1:1000. For immunofluorescence microscopy of cultured podocytes, hamster anti-total  $\beta 1$  integrin (BioLegend), and rat anti-mouse monoclonal antibody 9EG7 against activated mouse  $\beta 1$  integrin<sup>9</sup> (BD Biosciences) were used at 1:100. Confocal microscopy and image processing were performed as before<sup>10</sup>.

### **FACS analysis of $\beta 1$ integrin activation in podocytes**

Podocytes were transfected with GFP (control), and GFP-tagged B7-1 constructs (full-length,  $\Delta$ tail or tail). At 48 h after transfection, fluorescence labeling was performed as described before<sup>11</sup> with some modifications<sup>12</sup>. Cells were harvested and suspended in TBS (20 mM Tris, 150 mM NaCl, pH 7.6) containing 5% BSA with 0.1% sodium azide for 30 min at 4 °C. For each experiment 10<sup>6</sup> cells were incubated on ice for 30 min with primary antibody (9EG7) against mouse activated  $\beta 1$  integrin<sup>9</sup> at 1:100 in TBS. Cells were washed twice with ice-cold TBS, incubated on ice for 20 min with allophycocyanin-labeled goat anti-rat IgG (Molecular Probes, Invitrogen) at 1:200 and washed twice with ice-cold TBS. The cells were subjected to FACS

analysis (FACSCalibur CellQuest Pro Software; Becton Dickinson) as described before<sup>12</sup>. All experiments were run in triplicates.

### **Cell migration assays**

The role of B7-1 in podocyte migration before and after LPS treatment (50 µg/ml) was assessed in a wound-healing assay as previously described<sup>4</sup>. For each experiment  $7 \times 10^5$  cells per cell line were seeded overnight on type-I collagen coated 6-well plates. Each well was then scratched with a sterile 200 µl pipette tip, washed with PBS and placed into fresh medium. After 24 h, cells were fixed with 4 % paraformaldehyde and permeabilized with 0.3 % Triton X-100 in PBS and cell nuclei were stained with DAPI. Pictures were captured by phase contrast microscopy under a 10× objective on a DMI 6000B microscope (Leica) at 0 and 24 h after scratching and the number of cells that had migrated into same size square fields (marked in Supplementary Fig. 3C-E) were counted. The data shown represent the mean  $\pm$  SD of 5-8 independent experiments. For pharmacologic blockade of B7-1 with CTLA4-Ig, podocytes were pretreated with 100 µg/ml CTLA4-Ig for 4 days, then followed by 50 µg/ml LPS with additional 100 µg/ml CTLA4-Ig.

### **Gene silencing of B7-1**

For the gene silencing of B7-1 three target sites were selected, and the following oligonucleotides (nt) were cloned into *BglII-HindIII* (all restriction enzymes were from New England Biolabs) sites of pSUPER-Zeo<sup>13</sup>. The B7-1 specific insert was a 19-nt sequence corresponding to the mouse B7-1 ORF, which is separated by a 9-nt noncomplementary spacer (TTCAAGAGA) from the reverse complement of the same 19-nt sequence. A control vector (pSUPER-control) was constructed using a 19-nt scrambled sequence with no significant homology to any mammalian gene sequence. Sequences of the synthesized primers (from 5' to

3') are shown below. Insertion of the oligonucleotides was verified by DNA sequencing. The following primers were used for gene silencing of B7-1:

scr-S: GATCCCCCTACAGTAACTCCGTCACTTTCAAGAGAAGTGACGGAGTTACTGTAGTTTTTA

scr-AS: AGCTTAAAAACTACAGTAACTCCGTCACTTCTCTTGAAAGTGACGGAGTTACTGTAGGGG

273-S: GATCCCCACATGACAAAGTGGTGCTGTTCAAGAGACAGCACCCTTTGTCATGTTTTTTA

273-AS: AGCTTAAAAAACATGACAAAGTGGTGCTGTCTCTTGAACAGCACCCTTTGTCATGTGGG

372-S: GATCCCCGAAAGAGGAACGTATGAATTCAAGAGATTCATACGTTCCCTCTTTCCTTTTTTA

372-AS: AGCTTAAAAAGAAAGAGGAACGTATGAATCTCTTGAATTCATACGTTCCCTCTTTCGGG

424-S: GATCCCCAAGAAGGAAAGAGGAACGTTTCAAGAGAACGTTCCCTCTTTCCTTTTTTTA

424-AS: AGCTTAAAAAAGAAGGAAAGAGGAACGTTCTCTTGAACGTTCCCTCTTTCCTTCTTGGG

Wild type and  $\alpha 3^{-/-}$  podocytes were transfected with 2  $\mu$ g of shRNA plasmid using FuGENE6 transfection agent (Roche) according to the manufacturer's instructions. 48 hours after transfection, cells were selected with 400  $\mu$ g/ml zeocin. Single clones were picked, and depletion of B7-1 protein abundance was verified by Western blotting using anti-B7-1 (Epitomics) at 1:1000.

### **Immunoprecipitation and GST binding**

SDS-PAGE, Western blotting, Co-IP of FLAG-tagged and GFP-tagged fusion proteins from transfected HEK293 cells, as well as endogenous Co-IP from podocytes were done as described before<sup>4,14</sup>. For endogenous Co-IP studies, the cells were lysed in IP buffer (50 mM Tris, pH 7.5, 150 mM NaCl, 1% Triton X-100) with protease inhibitors on ice for 30 min, then centrifuged at 4°C, 13000 rpm, for 15 minutes. Anti- $\alpha 5$  integrin (R&D Systems) was used at 1:500, anti- $\alpha V$  integrin (eBioscience) at 1:500, anti- $\beta 1$  integrin (BioLegend) at 1:1000. Co-IP of FLAG- and GFP-tagged fusion proteins from co-transfected HEK293 cells as well as GST interaction studies with purified recombinant proteins were done as described before<sup>14</sup>.

### **Phorbol myristate acetate (PMA) induced cell spreading of K562 cells**

We used a previously described cell adhesion and spreading assay<sup>8</sup> to determine the effects of B7-1 and B7-1 $\Delta$ tail on integrin-mediated cell spreading. K562 cells (ATCC) constitutively express  $\alpha$ 5 $\beta$ 1 integrin<sup>15,16</sup>. K562 cells stably expressing  $\alpha$ V $\beta$ 3 integrin (K562  $\alpha$ V $\beta$ 3) were generated as described before<sup>8</sup>.  $10^7$  cells were transfected by electroporation with 10  $\mu$ g each of human pcDNA- $\alpha$ V and pcDNA- $\beta$ 3. Integrin expressing cells were selected using 500  $\mu$ g/ml of G418 (Invivogen) and single cell clones expressing high levels of integrin on the cell surface were obtained using FACS and limited dilution cloning<sup>8</sup>. B7-1 and B7-1 $\Delta$ tail were introduced in these cell lines by electroporation K562 or K562  $\alpha$ V $\beta$ 3 cells with 10  $\mu$ g each of pcDNA-B7-1 and pMSCV-puro empty vector or pcDNA-B7-1 $\Delta$ tail and pMSCV-puro empty vector, respectively. Cells were then grown in 2  $\mu$ g/ml puromycin and 500  $\mu$ g/ml G418. High B7-1 expressing single cell clones were selected by limited dilution cloning and B7-1 and B7-1 $\Delta$ tail protein abundance was determined by FACS analysis using FITC conjugated anti-B7-1 antibody (BD Bioscience) at 1:100 (Fig. 4A, D of Supplementary Appendix). For the cell spreading assays, K562 cells expressing  $\alpha$ 5 $\beta$ 1 were seeded on 96-well Maxisorp plates (Nunc) coated with 6  $\mu$ g/ml purified recombinant fibronectin<sup>17</sup> overnight at 4 °C. The K562  $\alpha$ V $\beta$ 3 cells were seeded on plates coated with 5  $\mu$ g/ml vitronectin (US Biologicals). 30,000 cells were added to each well in serum free IMDM media (Mediatech), stimulated with PMA (10 nM) to induce spreading and incubated at 37 °C until spreading was observed<sup>18,19</sup>. The cells were fixed with 4% PFA in PBS and images of ten independent random fields were captured under DIC microscopy with a 20x objective using a DMI 6000B microscope (Leica). The total number of round and spread cells was manually counted in a blinded fashion and the percentage of spread cells was calculated. For B7-1 blockade with CTLA4-Ig, 384 well High Bind plates (Corning) were coated overnight with 6  $\mu$ g/ml of fibronectin in PBS. K562 cells expressing  $\alpha$ 5 $\beta$ 1,  $\alpha$ 5 $\beta$ 1 and B7-1, or  $\alpha$ 5 $\beta$ 1 and B7-1 $\Delta$ tail were incubated overnight with 100  $\mu$ g/ml of CTLA4-Ig. Cells were washed twice with IMDM +



0.1% BSA. 5000  $\alpha 5\beta 1$  expressing K562 cells were added to each well of a coated 384 well plate. 100  $\mu\text{g/ml}$  of CTLA4-Ig and 10 nM PMA were added to each well. Cells were allowed to adhere at 37 °C. After 1h, the plates were inverted for an additional 2 h. Cells were fixed with 4% PFA in PBS and spreading was quantified as described above. Statistical analysis was done with Graphpad Prism 5 software.

## Supplementary Figures

### Supplementary Figure 1 Integrin $\beta 1$ binds to B7-1 via direct tail:tail interaction

(A) Western blot analysis of anti- $\beta 1$  immunoprecipitates developed with anti- $\alpha 5$ , anti- $\alpha V$  and anti- $\beta 1$  antibodies.  $\alpha 5$  and  $\alpha V$  integrins co-precipitated with  $\beta 1$  integrin in wild type and  $\alpha 3^{-/-}$  podocytes. IP with anti-GFP (control) served as negative control. (B) Confocal microscopy showed co-localization of B7-1 and vinculin in focal contacts of  $\alpha 3^{-/-}$  integrin podocytes (arrowheads). (C) Western blot analysis showing endogenous Co-IP of B7-1 and  $\beta 1$  integrin from  $\alpha 3^{-/-}$  but not from wild type podocytes. No interaction was found with anti-GFP (control) serving as negative control in the IP. (D) Domain structure of B7-1 (full-length) and three deletion constructs,  $\Delta EC$ ,  $\Delta tail$  and tail. TM: transmembrane domain. (E) To map the interaction domains between B7-1 and  $\beta 1$  integrin, we examined three FLAG-B7-1 constructs (full-length,  $\Delta EC$ , and  $\Delta tail$ ) for their ability to co-precipitate GFP- $\beta 1$  integrin or a GFP- $\beta 1$  integrin deletion protein lacking the extracellular domains ( $\beta 1\Delta EC$ ). Western blot analysis of co-precipitates with anti-GFP, blotted with anti-FLAG (middle panel) or anti-GFP (upper and lower panels). We observed a specific interaction between both full-length proteins (data not shown), confirming the endogenous Co-IP results, and the interaction was preserved between B7-1 $\Delta EC$  and  $\beta 1\Delta EC$ . In contrast, deletion of the cytoplasmic tail of B7-1 (B7-1 $\Delta tail$ ) abrogated  $\beta 1\Delta EC$  binding. No interaction was found between FLAG-B7-1 and GFP-sui (control); \*: IgG light chain, \*\*: IgG heavy chain. (F) Left panel: Direct binding of purified FLAG-B7-1 to purified GST- $\beta 1\Delta EC$  but not the GST control. The B7-1- $\beta 1\Delta EC$  mixture was immunoprecipitated with anti-GST and blotted using anti-FLAG or anti-GST. Right panel: Coomassie stained SDS PAGE shows purity of purified recombinant proteins.

### **Supplementary Figure 2 B7-1 but not B7-2 interacts with $\beta$ 1 and $\beta$ 3 integrins**

(A) GFP-talin-HN, GFP-B7-1 and GFP-B7-1tail co-precipitated with FLAG- $\beta$ 1 $\Delta$ EC and FLAG- $\beta$ 3 $\Delta$ EC from co-transfected HEK293 cells. The interaction with talin served as positive control. No interaction was found with GFP-B7-1 $\Delta$ tail, GFP-B7-2 or GFP-sui (control) serving as negative control. (B) Direct binding of purified FLAG-B7-1 to purified GST- $\beta$ 3 $\Delta$ EC but not the GST control (left panels). Coomassie stained SDS PAGE shows the purity of recombinant proteins (right panels).

### **Supplementary Figure 3 CTLA4-Ig blocks B7-1 mediated loss of $\beta$ 1 integrin activation in podocytes**

(A) Representative confocal images stained with antibodies to total  $\beta$ 1 or activated  $\beta$ 1 integrin of podocytes expressing empty vector (pcDNA), vector encoding B7-1 or B7-1 $\Delta$ tail in the absence (left panels) or presence of LPS (right panels). B7-1, but not B7-1 $\Delta$ tail, suppressed podocyte  $\beta$ 1 integrin activation, but had no effect on total  $\beta$ 1 integrin levels. CTLA4-Ig treatment of B7-1 expressing podocytes restored  $\beta$ 1 integrin activation. Similar results were observed in the respective LPS-treated podocytes. (B) Gene silencing of B7-1 (B7-1kd) protected against LPS-induced loss of  $\beta$ 1 activation. (C) In  $\alpha$ 3<sup>-/-</sup> podocytes,  $\beta$ 1 integrin was largely absent. Gene silencing of B7-1 or CTLA4-Ig treatment restored  $\beta$ 1 integrin activation. (D) Quantitative analysis of podocytes  $\beta$ 1 integrin activation by flow cytometry. Compared to the GFP control, GFP-B7-1 (full) and GFP-B7-1-tail significantly reduced the activation of  $\beta$ 1 integrin (% activated- $\beta$ 1 positive cells per GFP-positive cells: GFP: 88.96  $\pm$  9.09 versus GFP-B7-1: 19.80  $\pm$  7.38 versus GFP-B7-1-tail: 36.52  $\pm$  2.18;  $P < 0.001$ ; AVOVA). In contrast, B7-1 $\Delta$ tail did not suppress  $\beta$ 1 activation (85.93  $\pm$  2.93 %; not significant).

**Supplementary Figure 4 CTLA4-Ig rescues B7-1 mediated suppression of  $\alpha 5\beta 1$  integrin dependent cell spreading**

(A) FACS analysis of B7-1 and B7-1 $\Delta$ tail protein abundance in K562 cells with stable  $\alpha 5\beta 1$  integrin expression. Protein levels of non-transfected K562 cells are shown in gray, and K562 cells with stable expression of B7-1 or B7-1 $\Delta$ tail in black. (B) B7-1 but not B7-1 $\Delta$ tail reduced  $\alpha 5\beta 1$  dependent spreading on fibronectin. CTLA4-Ig treatment restored spreading of B7-1 expressing cells to control levels. (C) Quantitative analysis of B7-1 and CTLA4-Ig effects on cell spreading (n = 10-16; % spreading cells: 45.52  $\pm$  1.27 for non-transfected control cells, 44.97  $\pm$  1.90 for non-transfected control cells + CTLA4-Ig, 17.0  $\pm$  0.8 for B7-1 expressing cells, 40.46  $\pm$  1.86 for B7-1 expressing cells + CTLA4-Ig, 47.71  $\pm$  1.67 for B7-1 $\Delta$ tail expressing cells, and 37.62  $\pm$  2.36 for B7-1 $\Delta$ tail expressing cells + CTLA4-Ig; \*\*\**P* < 0.0001, ANOVA). (D) FACS analysis of B7-1 and B7-1 $\Delta$ tail levels in K562 cells with stable  $\alpha V\beta 3$  integrin expression. Proteins levels of non-transfected K562 cells are shown in gray, and of K562 cells with stable transfection of B7-1 or B7-1 $\Delta$ tail in black. (E) Neither B7-1 nor B7-1 $\Delta$ tail affected spreading of  $\alpha V\beta 3$  expressing K562 cells on vitronectin. (F) B7-1 does not significantly change  $\alpha V\beta 3$  dependent cell spreading (n = 10; % spreading cells: 15  $\pm$  1 for non-transfected cells, 12  $\pm$  1 for B7-1 and 11  $\pm$  1 for B7-1 $\Delta$ tail; student's t-test, S.E.M reported). N.S., not significant.

**Supplementary Figure 5 B7-1 disrupts binding of talin to  $\beta 1$  but not to  $\beta 3$  integrin**

(A) Endogenous talin co-precipitated with activated  $\beta 1$  integrin in wild type but not in  $\alpha 3^{-/-}$  podocytes. IP with anti-GFP (control) served as negative control. (B) FLAG-B7-1 did not bind to GFP-talin-HN (HN: head N-terminal domain; left lane). Co-expression of GFP-B7-1-tail but not GFP-B7-1 $\Delta$ tail blocked the interaction of GFP-talin-HN with FLAG- $\beta 1$  integrin ( $\beta 1\Delta$ EC) in co-transfected HEK293 cells. Instead, GFP-B7-1-tail co-precipitated with FLAG- $\beta 1\Delta$ EC. No

interaction was found between FLAG-B7-1 and GFP-talin-HN. **(C)** Upper panel: immobilized GST- $\beta$ 1 $\Delta$ EC but not the GST control directly bound to purified FLAG-talin-HN. In the presence of increasing amounts of FLAG-B7-1 $\Delta$ EC, the binding of talin-HN to GST- $\beta$ 1 $\Delta$ EC was gradually lost, whereas binding of B7-1 to  $\beta$ 1 integrin could now be detected. Lower panel: Coomassie stained SDS PAGE analysis shows purity of recombinant proteins. **(D)** Co-expression of GFP-B7-1-tail did not block the interaction of GFP-talin-HN with FLAG- $\beta$ 3 $\Delta$ EC in triple transfected HEK293 cells. Instead, both GFP-B7-1-tail and GFP-talin-HN co-precipitated with FLAG- $\beta$ 3 $\Delta$ EC. No binding was found with GFP-sui (control).

## Supplementary References

1. Genovese MC, Becker JC, Schiff M, et al. Abatacept for rheumatoid arthritis refractory to tumor necrosis factor alpha inhibition. *N Engl J Med* 2005;353:1114-23.
2. Fornoni A, Sageshima J, Wei C, et al. Rituximab targets podocytes in recurrent focal segmental glomerulosclerosis. *Sci Transl Med* 2011;3:85ra46.
3. Mundel P, Heid HW, Mundel TM, Kruger M, Reiser J, Kriz W. Synaptopodin: an actin-associated protein in telencephalic dendrites and renal podocytes. *J Cell Biol* 1997;139:193-204.
4. Asanuma K, Yanagida-Asanuma E, Faul C, Tomino Y, Kim K, Mundel P. Synaptopodin orchestrates actin organization and cell motility via regulation of RhoA signalling. *Nat Cell Biol* 2006;8:485-91.
5. Mundel P, Reiser J, Borja AZ, et al. Rearrangements of the cytoskeleton and cell contacts induce process formation during differentiation of conditionally immortalized mouse podocyte cell lines. *Exp Cell Res* 1997;236:248-58.
6. Reiser J, Oh J, Shirato I, et al. Podocyte migration during nephrotic syndrome requires a coordinated interplay between cathepsin L and alpha3 integrin. *The Journal of biological chemistry* 2004;279:34827-32.
7. Reiser J, von Gersdorff G, Loos M, et al. Induction of B7-1 in podocytes is associated with nephrotic syndrome. *J Clin Invest* 2004;113:1390-7.
8. Gupta V, Gylling A, Alonso JL, et al. The beta-tail domain (betaTD) regulates physiologic ligand binding to integrin CD11b/CD18. *Blood* 2007;109:3513-20.
9. Lenter M, Uhlig H, Hamann A, Jenö P, Imhof B, Vestweber D. A monoclonal antibody against an activation epitope on mouse integrin chain beta 1 blocks adhesion of lymphocytes to the endothelial integrin alpha 6 beta 1. *Proc Natl Acad Sci U S A* 1993;90:9051-5.

10. Wong JS, Iorns E, Rheault MN, et al. Rescue of tropomyosin deficiency in *Drosophila* and human cancer cells by synaptopodin reveals a role of tropomyosin alpha in RhoA stabilization. *EMBO J* 2012;31:1028-40.
11. Wennerberg K, Fassler R, Warmegard B, Johansson S. Mutational analysis of the potential phosphorylation sites in the cytoplasmic domain of integrin beta1A. Requirement for threonines 788-789 in receptor activation. *J Cell Sci* 1998;111 ( Pt 8):1117-26.
12. Asanuma K, Campbell KN, Kim K, Faul C, Mundel P. Nuclear relocation of the nephrin and CD2AP-binding protein dendrin promotes apoptosis of podocytes. *Proc Natl Acad Sci U S A* 2007;104:10134-9.
13. Asanuma K, Kim K, Oh J, et al. Synaptopodin regulates the actin-bundling activity of alpha-actinin in an isoform-specific manner. *J Clin Invest* 2005;115:1188-98.
14. Faul C, Donnelly M, Merscher-Gomez S, et al. The actin cytoskeleton of kidney podocytes is a direct target of the antiproteinuric effect of cyclosporine A. *Nat Med* 2008;14:931-8.
15. Wattam B, Shang D, Rahman S, et al. Arg-Tyr-Asp (RYD) and Arg-Cys-Asp (RCD) motifs in dendroaspin promote selective inhibition of beta1 and beta3 integrins. *The Biochemical journal* 2001;356:11-7.
16. Blystone SD, Graham IL, Lindberg FP, Brown EJ. Integrin alpha v beta 3 differentially regulates adhesive and phagocytic functions of the fibronectin receptor alpha 5 beta 1. *J Cell Biol* 1994;127:1129-37.
17. Ohashi T, Erickson HP. Domain unfolding plays a role in superfibronectin formation. *The Journal of biological chemistry* 2005;280:39143-51.
18. Yamodo IH, Blystone SD. Integrin alphaIIb-subunit cytoplasmic domain mutations demonstrate a requirement for tyrosine phosphorylation of beta3-subunits in actin cytoskeletal organization. *Cell Commun Adhes* 2004;11:121-35.

19. Blystone SD, Williams MP, Slater SE, Brown EJ. Requirement of integrin beta3 tyrosine 747 for beta3 tyrosine phosphorylation and regulation of alphavbeta3 avidity. *The Journal of biological chemistry* 1997;272:28757-61.



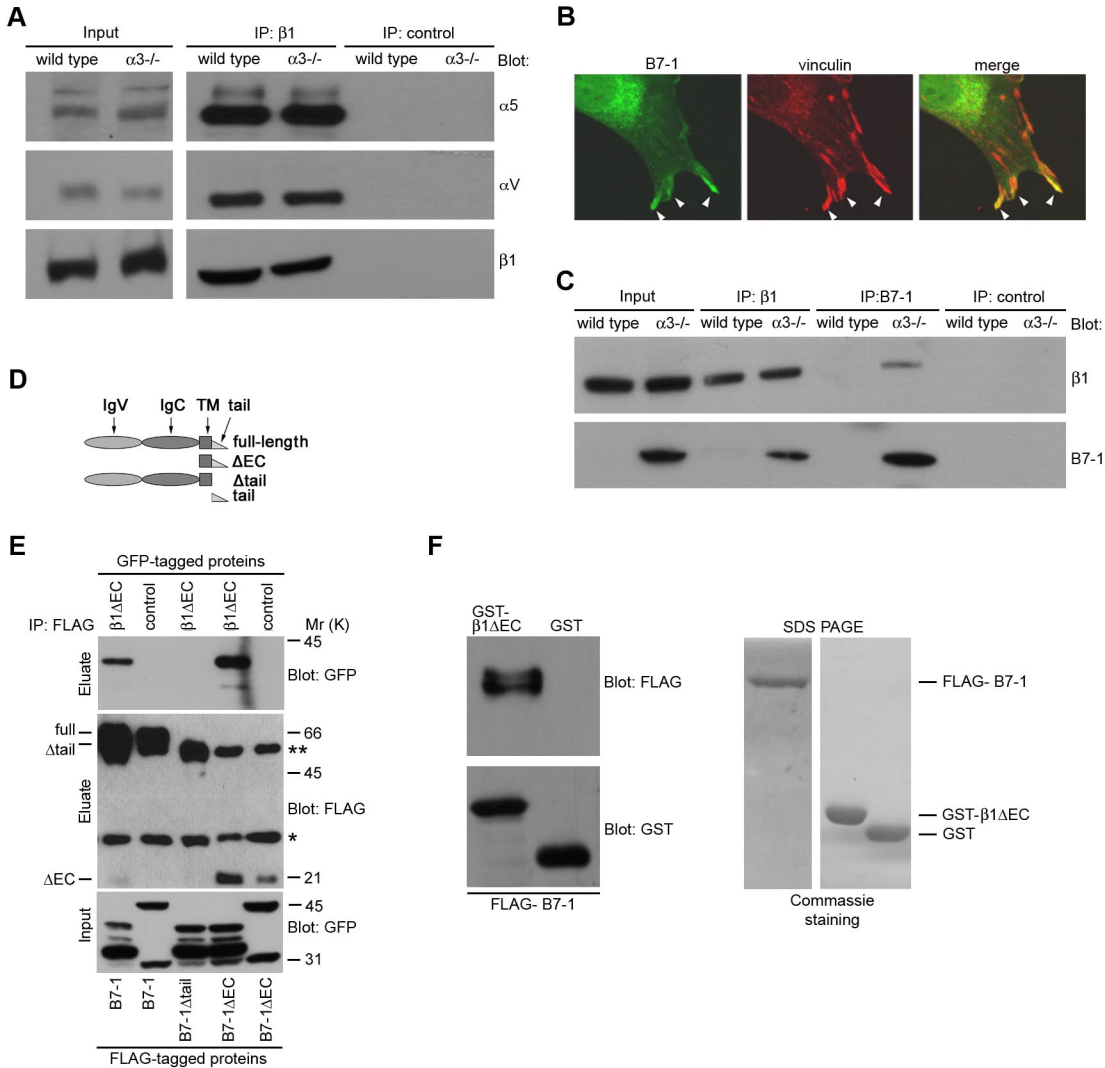

Supplementary Figure 1

**A**

GFP-tagged proteins

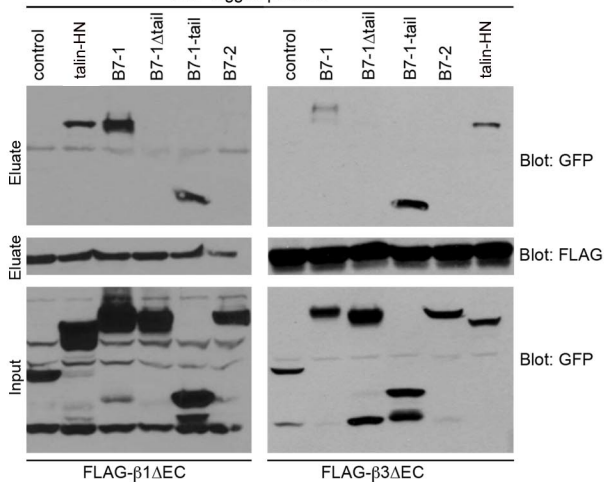**B**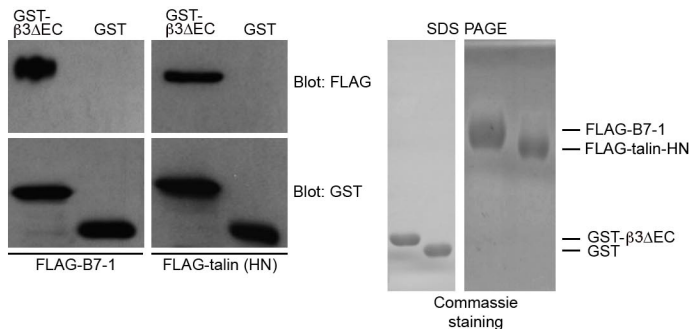

Supplementary Figure 2

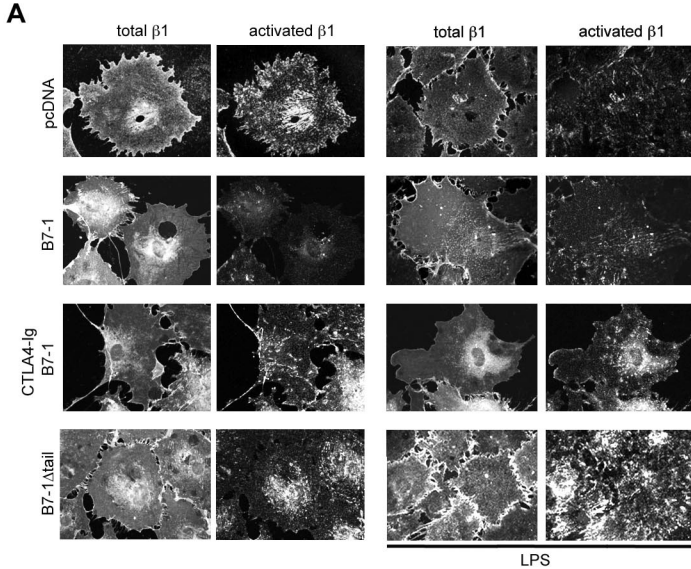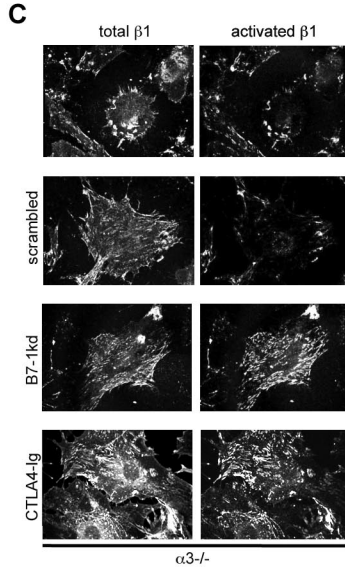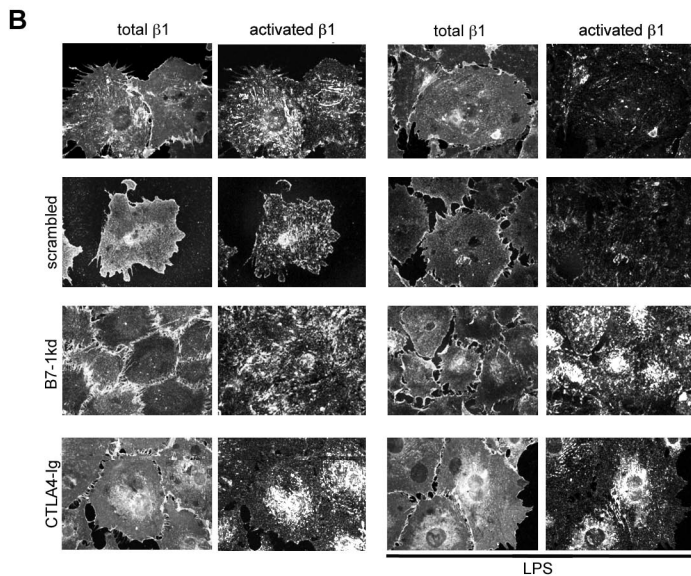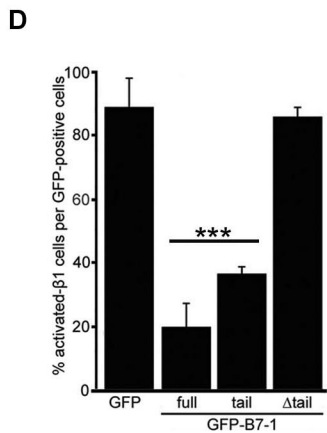

Supplementary Figure 3

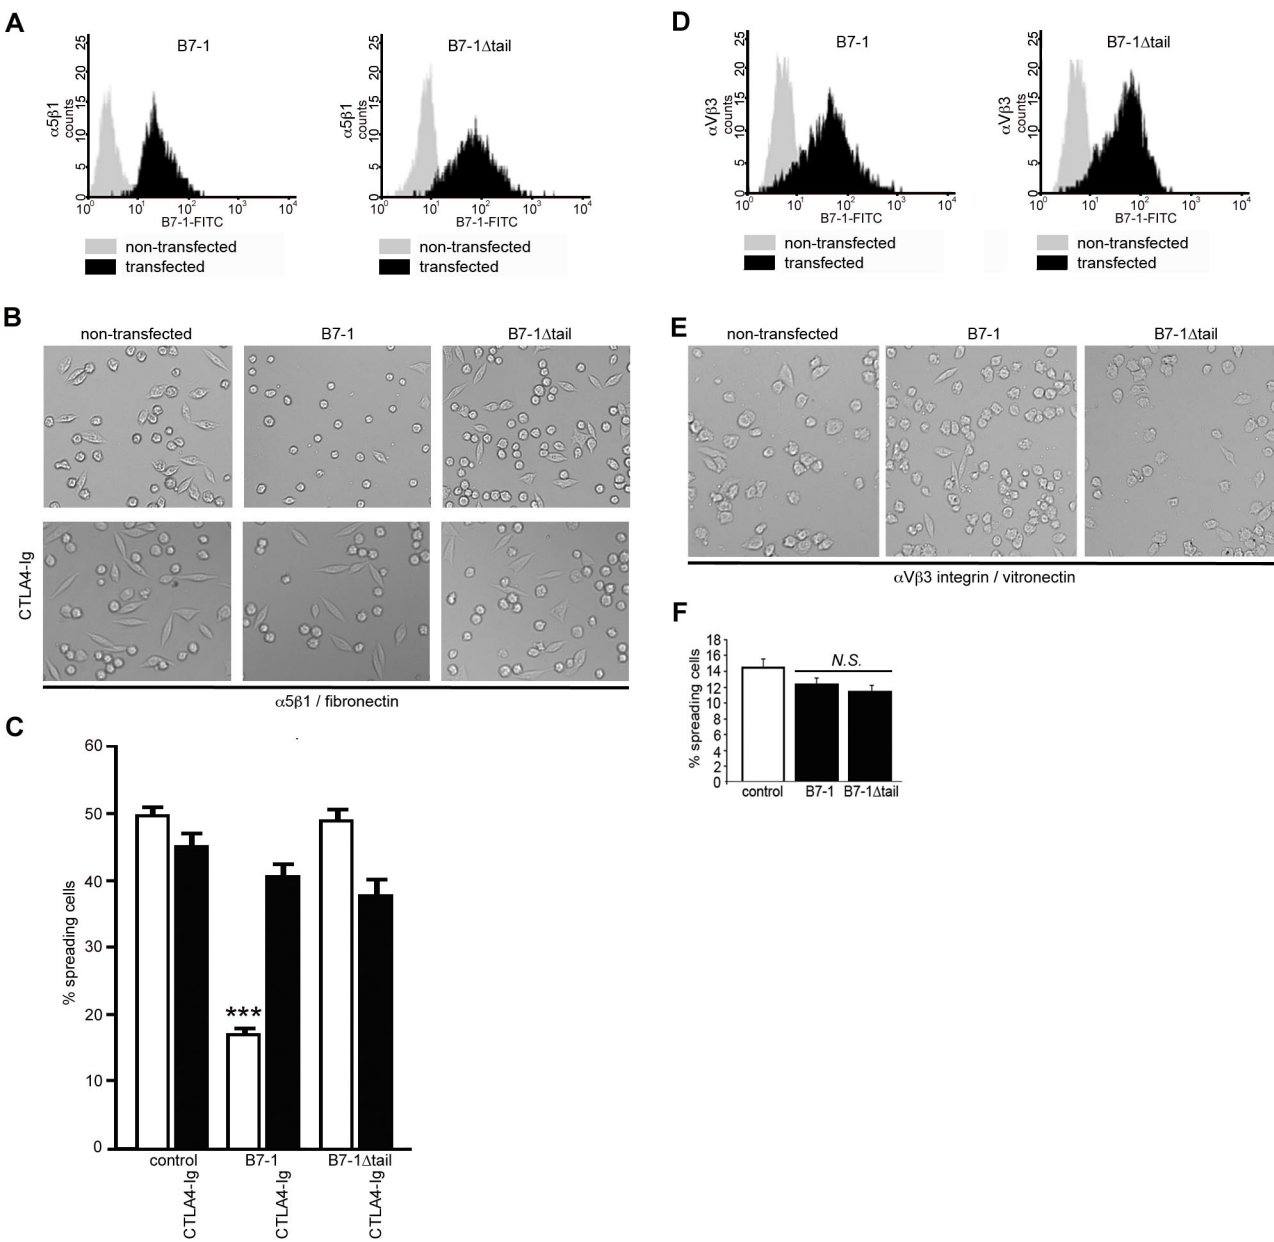

Supplementary Figure 4

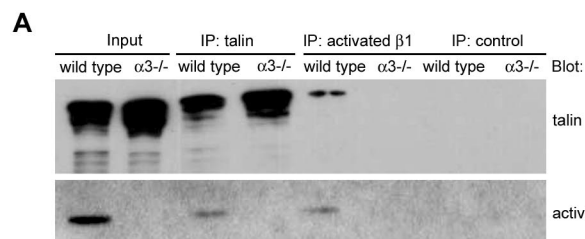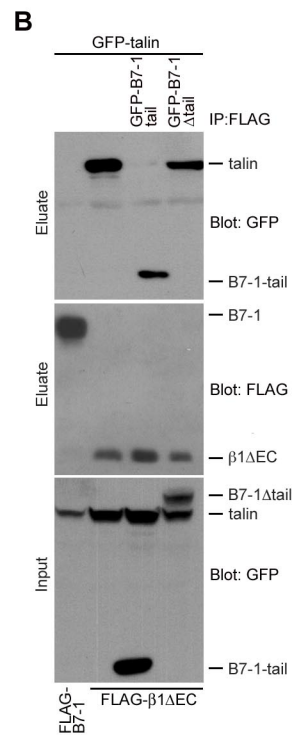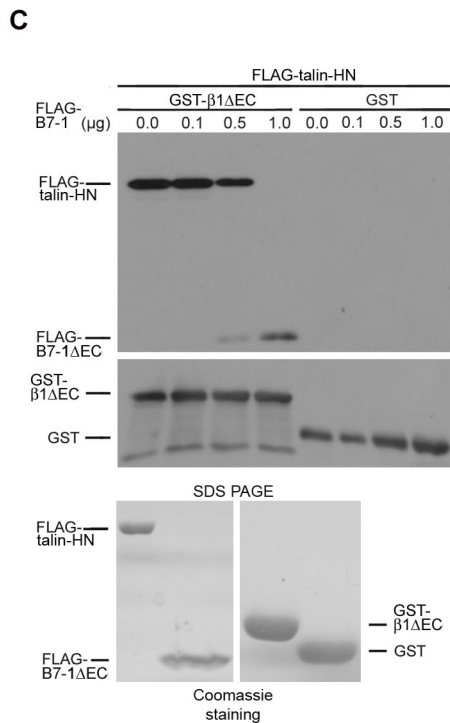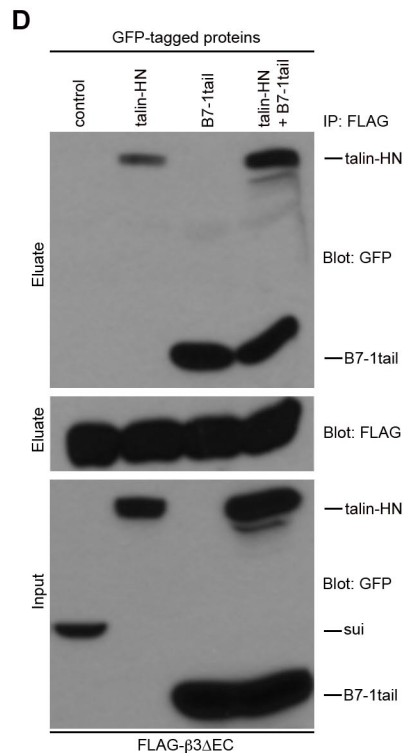

Supplementary Figure 5
